# Supplementary material for: A synergistic photothermal-dual site strategy to accelerate proton–electron transfer enables enhanced CO 2 -to-syngas conversion
Source: Royal Society of Chemistry journal article supplement (doi:10.1039/d4ta09093d), 2025-01-01
Supplement: d4ta09093d1.xlsx [file d4ta09093d1.xlsx]

## Sheet: sum
Pt/Ta2O5-x
WOR：*O + H2O(l) --> *HOO + H+ + e-
	∆G	∆E	∆ZPE	T∆S	∆E	Eslab+HOO	EH+	EH2O		Eslab+O	∆ZPE (eV)	ZPE slab-HOO	ZPEH+	ZPE H2O		ZPE slab-O	T∆S (eV)	S H2/2(g)	S H2O(l)		T(K)
	1.88972	1.95064	-0.076455	-0.0155326	1.95064	-554.929	-3.385	-14.23		-546.034	-0.076455	0.427335	0.137	0.57		0.07079	-0.0155326	65.429	70.416		300
CO2RR：*CO --> CO(g)+ slab
	∆G	∆E	∆ZPE	T∆S	∆E	Eslab	ECO			Eslab-CO	∆ZPE (eV)	ZPE slab-CO		ZPE CO			T∆S (eV)	S slab-CO	S CO(g)		T(K)
	1.83034	2.52438	-0.07786	0.616174	2.52438	-539.415	-14.8			-556.739	-0.07786	0.21102		0.13316			0.616174	0	197.833		300
Synergistic reaction：*O+*CO + H2O(l) --> *HOO + H+ + e- + CO(g)
	∆G	∆E	∆ZPE	T∆S	∆E	Eslab+HOO+CO				EslabO-COOH	∆ZPE (eV)	ZPE-HOO-CO				ZPE-O-COOH	T∆S (eV)				T(K)
	1.4319	1.47539	-0.0434865	0	1.47539	-571.772				-573.248	-0.0434865	0.643221				0.686708	0	0	0	0	300
