# Supplementary material for: A synergistic photothermal-dual site strategy to accelerate proton–electron transfer enables enhanced CO 2 -to-syngas conversion
Source: Royal Society of Chemistry journal article supplement (doi:10.1039/d4ta09093d), 2025-01-01
Supplement: d4ta09093d2.pdf [file d4ta09093d2.pdf]

Electronic Supplementary Material (ESI) for Journal of Materials Chemistry A.  
This journal is © The Royal Society of Chemistry 2024

## Electronic supplementary information

### **Synergistic photothermal-dual site strategy to accelerate proton–electron transfer enables enhanced CO<sub>2</sub>-to-syngas conversion.**

Lang Pei,<sup>1,2\*</sup> Haichuan Feng,<sup>1</sup> Qinan Mao,<sup>1</sup> Lixiang Wang,<sup>1</sup> Yu Zhang,<sup>1</sup> Xin Wen,<sup>3\*</sup> Xusheng Wang,<sup>4</sup>  
Xiao Liu<sup>5\*</sup>

<sup>1</sup> College of Materials and Environmental Engineering, Hangzhou Dianzi University, Hangzhou 310018, China

<sup>2</sup> Laboratory of Solid State Microstructures, Nanjing University, Nanjing 210093, China

<sup>3</sup> Guangxi Key Laboratory of Information Materials, Guangxi Collaborative Innovation Center of Structure and Property for New Energy and Materials, School of Materials Science and Engineering, Guilin University of Electronic Technology, Guilin 541004, China

<sup>4</sup> School of Materials Science and Engineering, Zhejiang Sci-Tech University, Hangzhou 310018, China

<sup>5</sup> Institute of Carbon Neutrality and New Energy, School of Electronics and Information, Hangzhou Dianzi University, Hangzhou 310018, China

**\*E-mail: peilang@hdu.edu.cn; wenxin@guet.edu.cn; liuxiao@hdu.edu.cn**

### 1.1 Materials characterization:

Scanning electron microscopy (SEM) was conducted using a JEOL-JSM-IT300HR field emission microscope. Transmission electron microscopy (TEM) and elemental mapping were performed with a JEOL-2010 TEM operating at an acceleration voltage of 200 kV. The molar ratio of Pt to Ta was determined by inductively coupled plasma-optical emission spectroscopy (ICP-OES) using an Optima 5300DV instrument (Perkin Elmer). X-ray diffraction (XRD) patterns were acquired with a Rigaku Ultima III X-ray diffractometer utilizing Cu K $\alpha$  radiation. Electron paramagnetic resonance (EPR) spectra were obtained at room temperature (25 °C) employing a Bruker A300-10/12 EPR spectrometer. X-ray photoelectron spectroscopy (XPS) measurements were performed using a Ka X-ray photoelectron spectrometer (Thermo Scientific), where the binding energy was calibrated to the C 1s peak at 284.6 eV as a charge reference. Light absorption spectra were recorded with a UV-vis spectrophotometer (UV-2450, Shimadzu Co., Japan). The H<sub>2</sub>O temperature-programmed desorption (TPD) spectroscopy was conducted on a Micromeritics AutoChem II chemisorption analyzer connected to a Pfeiffer OmniStar mass spectrometer. In-situ Fourier transform infrared (FTIR) spectroscopy was performed using a Nicolet Nexus 870 infrared spectrometer (Nicolet, USA). Photoluminescence (PL) spectra were acquired with a fluorescence spectrometer (Edinburgh Instrument FS5). Photoelectrochemical measurements were carried out in a standard three-electrode setup utilizing a CHI 660E electrochemical workstation (Chenhua, China). The electrolyte was N<sub>2</sub>-saturated 1M NaOH, with a Pt foil serving as the counter electrode and a Hg/HgO electrode as the reference. The prepared samples were spin-coated onto fluorine-doped SnO<sub>2</sub> (FTO) glass at 500 rpm for 30 s, functioning as self-supported working electrodes. Electrode potentials were converted to the reversible hydrogen electrode (RHE) reference scale using  $E_{\text{RHE}} = E_{\text{Hg/HgO}} + 0.098 \text{ V} + 0.059 * \text{pH}$ . The EIS curved were tested at open-circuit voltage (OCV) from 0.01 Hz to 10 MHz with a sinusoidal voltage amplitude of 5.0 mV.

### 1.2 Apparent Quantum Yield Calculation

The AQY test of 0.5Pt/Ta<sub>2</sub>O<sub>5-x</sub> was taken under constant 8 h irradiation by a 300 W xenon lamp with a monochromator ( $\lambda$  =365 nm) band-pass filter (ZBPA500, Asahi Spectra Co., FWHM: 10 nm). The average light intensity was recorded to be 10 mW cm<sup>-2</sup> by a spectroradiometer and the irradiation area was 4.2 cm<sup>2</sup>. The amount of incident electrons (N) is determined by equation:

$$N = \frac{E \times S \times t \times \lambda}{h \times c} = \frac{10 \times 10^{-3} \times 4.2 \times 8 \times 3600 \times 365 \times 10^{-9}}{6.626 \times 10^{-34} \times 3 \times 10^8}$$

$$= 2.22 \times 10^{21} \quad (1)$$

The amount of CO and H<sub>2</sub> molecule yielded at 8 h was 15.6  $\mu$ mol and 49.3  $\mu$ mol, respectively. The AQY was calculated by equation:

$$AQY = \frac{2 \times \text{number of } (CO + H_2) \text{ molecular}}{\text{number of incident photons}} \times 100\%$$

$$= \frac{2 \times (15.6 + 49.3) \times 10^{-6} \times 6.02 \times 10^{23}}{2.22 \times 10^{21}} \times 100\%$$

$$= 3.5\% \quad (2)$$

where E, S, t,  $\lambda$ , h, and c are the average light intensity (10 mW cm<sup>-2</sup> nm<sup>-1</sup>), the illumination area (4.2  $\times$  cm<sup>2</sup>), the illumination time (8  $\times$  3600 s), the wavelength of the incident light (365  $\times$  10<sup>-9</sup> m), the Planck constant (6.626  $\times$  10<sup>-34</sup> J.s) and the velocity of light (3  $\times$  10<sup>8</sup> m s<sup>-1</sup>), respectively

### 1.3 Theoretical calculations

All the calculations were carried out based on density functional theory (DFT) with the Perdew-Burke-Ernzerbof (PBE) form of generalized gradient approximation

functional (GGA) by employing the Vienna ab-initio simulation package (VASP).<sup>1-3</sup> The Blöchl's all-electron-like projector augmented wave (PAW) method was used to describe the interactions between valence electrons and ion cores.<sup>4</sup> To construct the composite model of Pt/Ta<sub>2</sub>O<sub>5-x</sub>, the (001) surface of Ta<sub>2</sub>O<sub>5-x</sub> with four atomic layers and the Pt cluster with eight Pt atoms are employed, where a 1.5 nm vacuum layer was added to avoid interactions. To reduce the lattice mismatch between Ta<sub>2</sub>O<sub>5-x</sub>(001) surface and Pt cluster, a 2×2 supercell of Ta<sub>2</sub>O<sub>5-x</sub>(001) are chosen. The lattice parameters of Ta<sub>2</sub>O<sub>5-x</sub> were calculated first with the plane wave cutoff energy set as 500 eV and the k-point mesh set as 8 × 12 × 6. To calculate the Ta<sub>2</sub>O<sub>5-x</sub>(001) slab, a 2 × 2 supercell is created and a 20 Å vacuum layer is added on top of the supercell to avoid inter-layer interactions. The oxygen vacancy on the Ta<sub>2</sub>O<sub>5-x</sub>(001) slab was created by removing one surface O atom from the perfect Ta<sub>2</sub>O<sub>5</sub>(001) surface. The free energies of adsorption are then calculated as  $\Delta G = \Delta E_{\text{DFT}} + E_{\text{ZPE}} - TS$ , where  $\Delta E_{\text{DFT}}$ ,  $E_{\text{ZPE}}$ , T, and S are adsorption enthalpy, zero-point energy, temperature (300 K), and entropy, respectively. Standard ideal gas methods were employed to compute  $E_{\text{ZPE}}$  and TS from temperature, pressure and the calculated vibrational energies. The limiting potential is calculated by taking the negative of the maximum free energy difference between each two successive steps in the free energy diagram. The computational hydrogen electrode model was employed to assess the free energy changes for each reaction step that involves a proton–electron pair transfer. In this model, the free energy of a proton–electron pair at 0 V vs. RHE is equivalent to half the free energy of a hydrogen molecule.

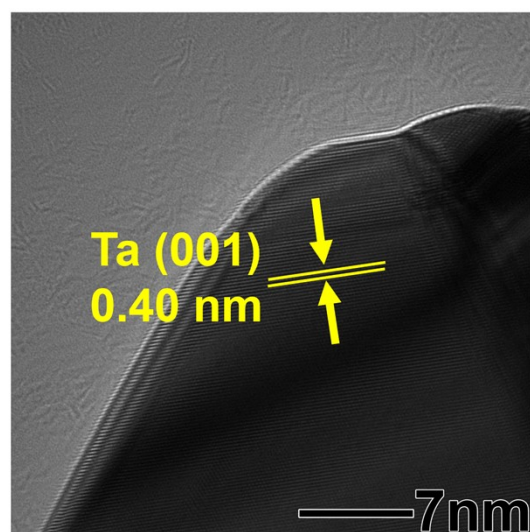

**Fig. S1.** The HRTEM image of Ta<sub>2</sub>O<sub>5-x</sub>.

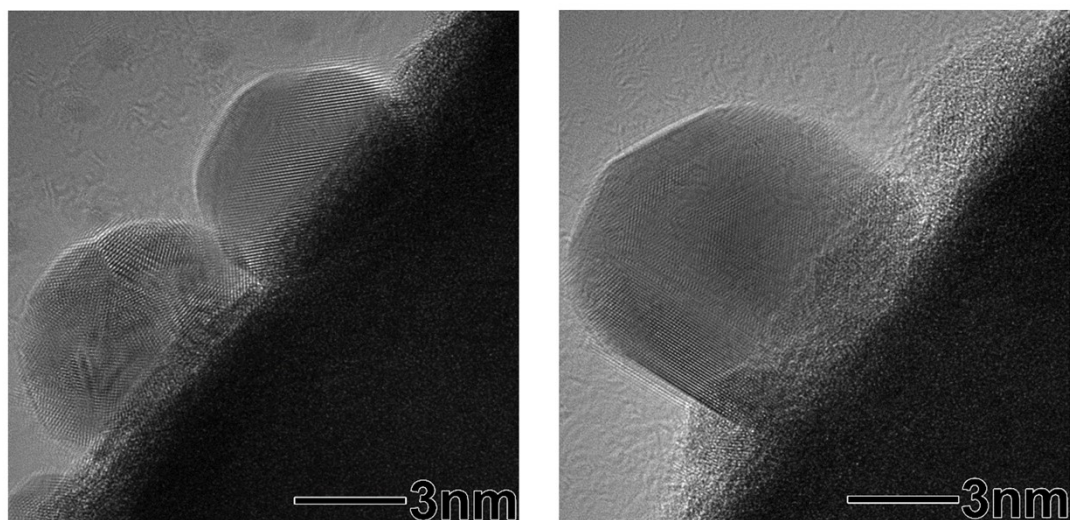

**Fig. S2.** The HRTEM images of 0.5Pt/Ta<sub>2</sub>O<sub>5-x</sub>.

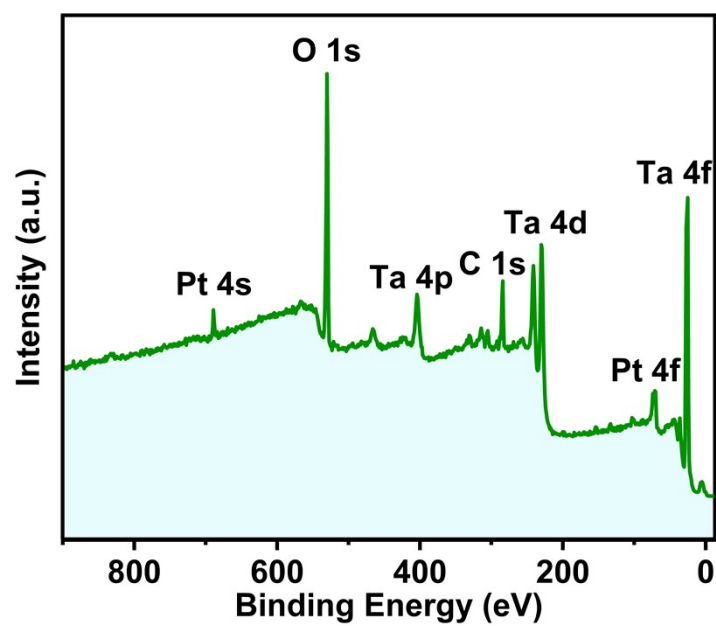

Fig. S3. XPS survey spectrum of 0.5Pt/Ta<sub>2</sub>O<sub>5-x</sub>.

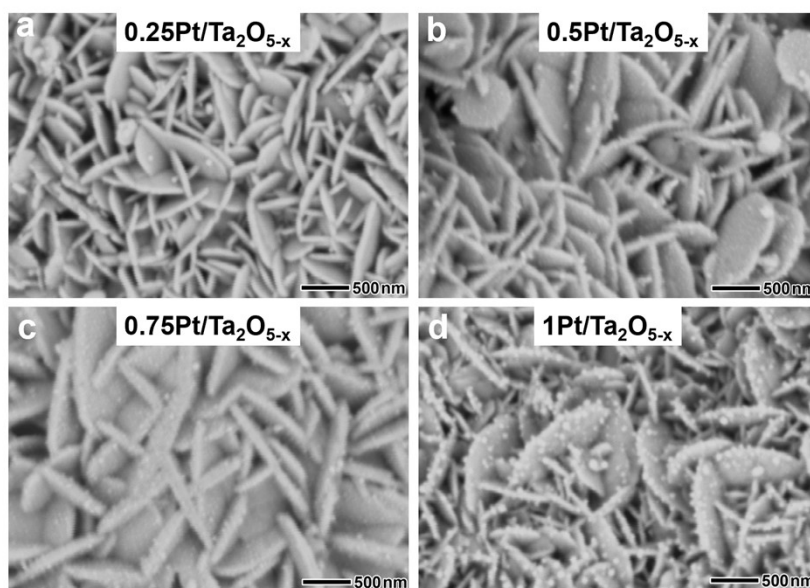

Fig. S4. SEM images of (a) 0.25Pt/Ta<sub>2</sub>O<sub>5-x</sub>, (b) 0.75Pt/Ta<sub>2</sub>O<sub>5-x</sub>, and (c) 1Pt/Ta<sub>2</sub>O<sub>5-x</sub>, respectively.

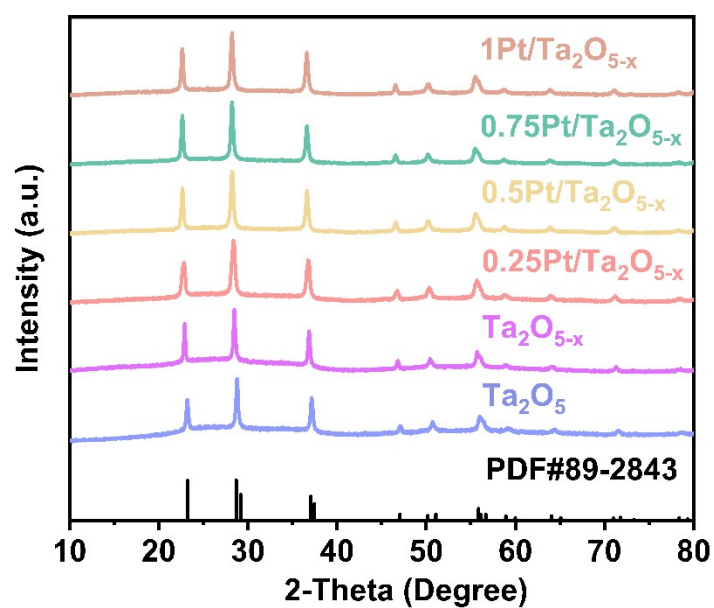

Fig. S5. XRD patterns of  $\text{Ta}_2\text{O}_5$ ,  $\text{Ta}_2\text{O}_{5-x}$ , and  $\text{Pt}/\text{Ta}_2\text{O}_{5-x}$ , respectively.

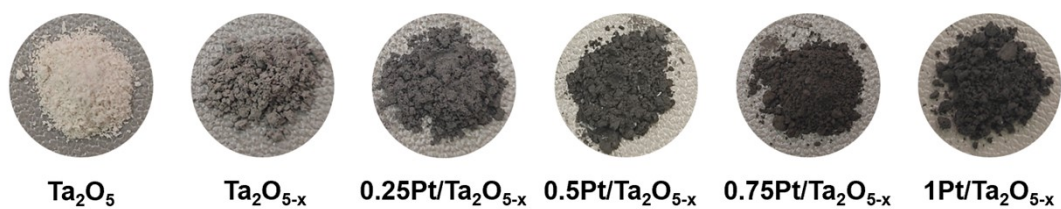

Fig. S6. Photographs of  $\text{Ta}_2\text{O}_5$ ,  $\text{Ta}_2\text{O}_{5-x}$ , and  $\text{Pt}/\text{Ta}_2\text{O}_{5-x}$ , respectively.



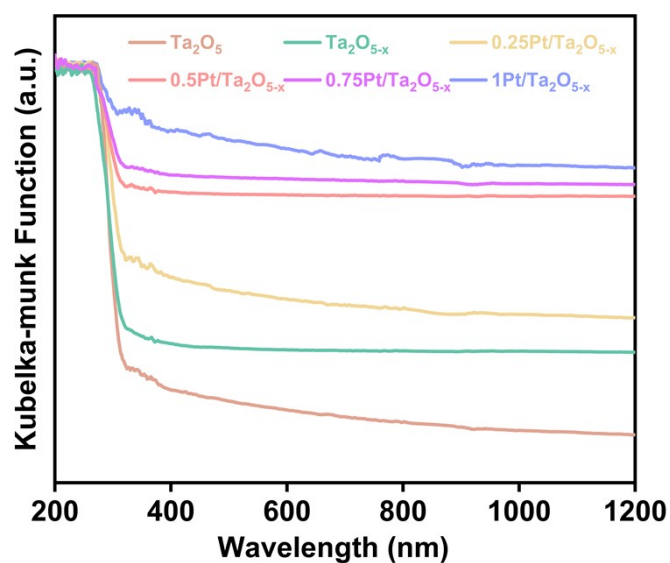

Fig. S7. UV-vis-NIR diffuse reflection spectra of  $\text{Ta}_2\text{O}_5$ ,  $\text{Ta}_2\text{O}_{5-x}$ , and  $\text{Pt}/\text{Ta}_2\text{O}_{5-x}$ , respectively.

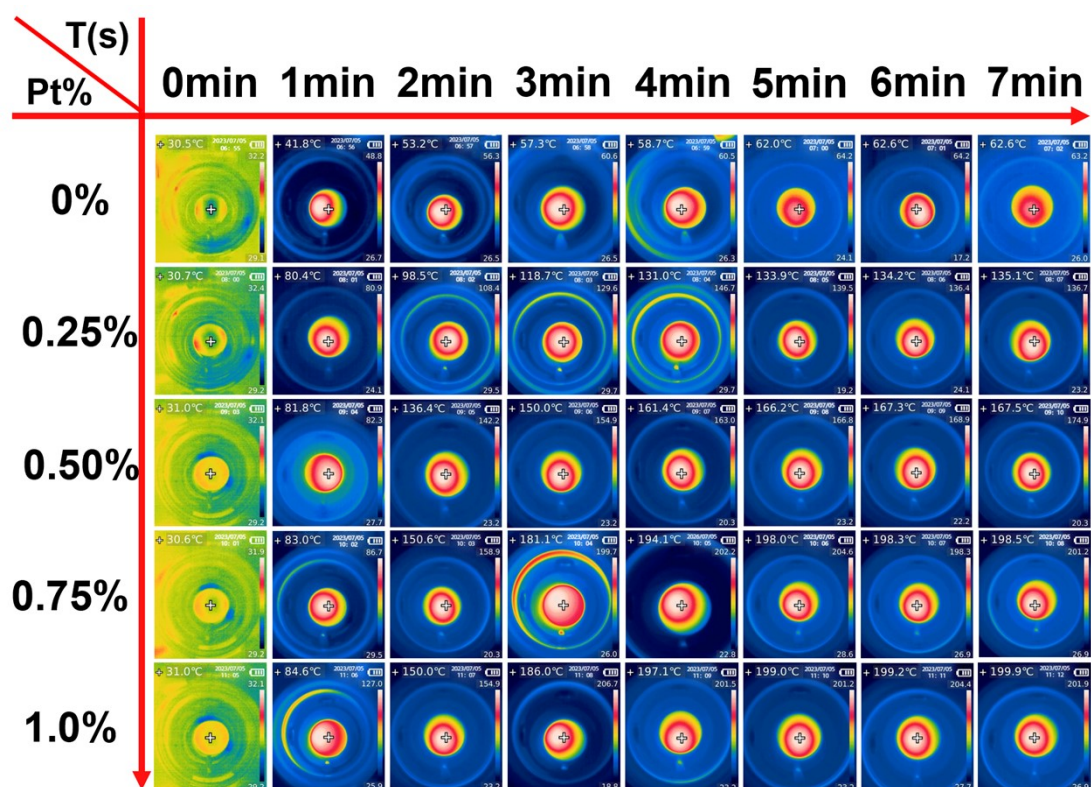

Fig. S8. Infrared photothermal images of  $\text{Ta}_2\text{O}_{5-x}$  and  $\text{Pt}/\text{Ta}_2\text{O}_{5-x}$  under continuous full-spectrum light irradiation ( $0.5 \text{ W}\cdot\text{cm}^{-2}$ ).



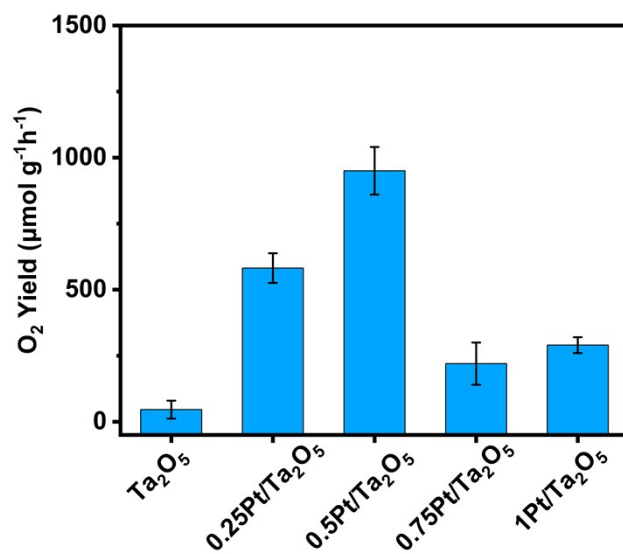

Fig. S9. O<sub>2</sub> yield rate over Ta<sub>2</sub>O<sub>5</sub> and Pt/Ta<sub>2</sub>O<sub>5</sub>, respectively.

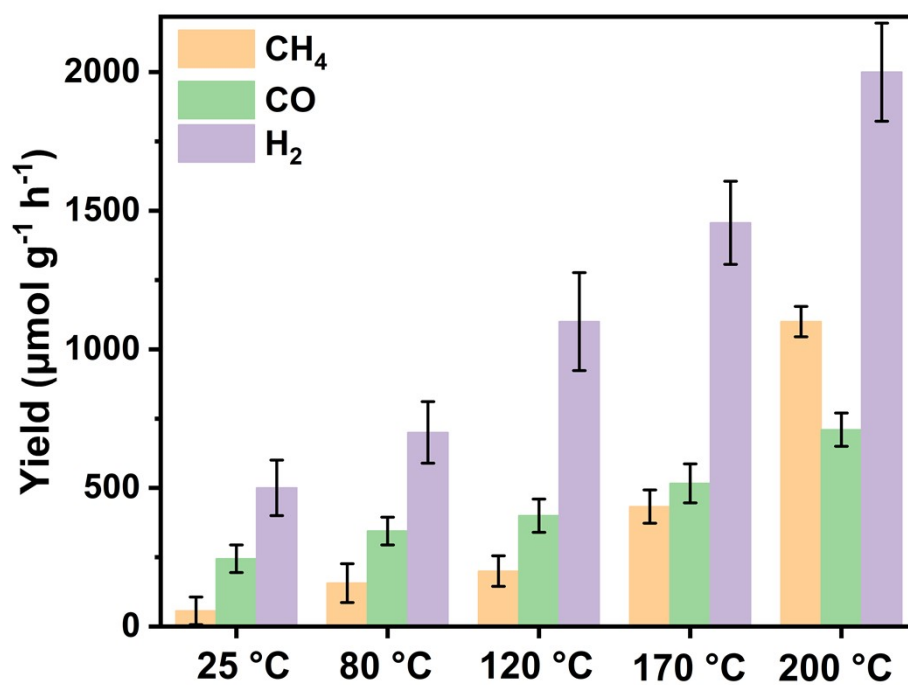

Fig. S10. The CO<sub>2</sub> reduction performance over 0.5Pt/Ta<sub>2</sub>O<sub>5-x</sub> system at different temperatures with the same irradiation intensity.

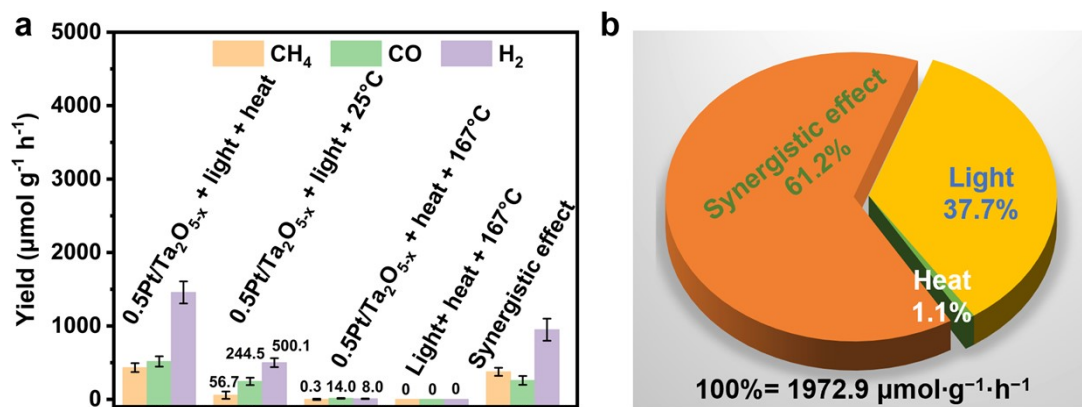

**Fig. S11.** (a) The CO<sub>2</sub> reduction performance over control variable catalysts. (b) Schematic diagram showing the respective percentage of light, heat, and synergy that contributed to the total syngas production.

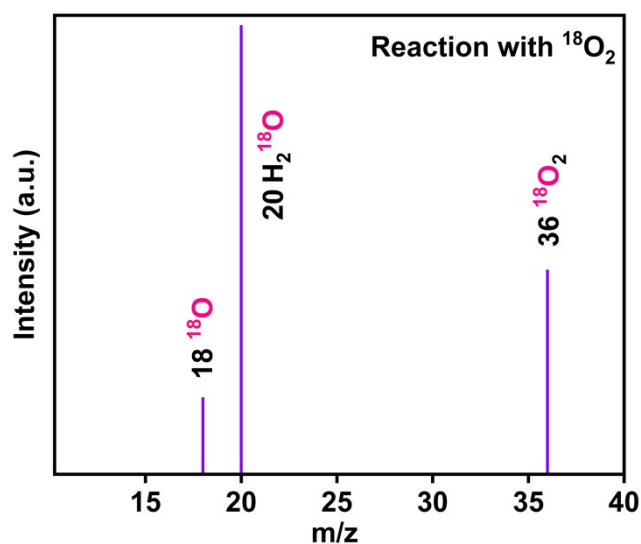

**Fig. S12.** Mass spectra of <sup>18</sup>O<sub>2</sub> (m/z = 36) produced over 0.5Pt/Ta<sub>2</sub>O<sub>5-x</sub> in the photoreduction of H<sub>2</sub><sup>18</sup>O.

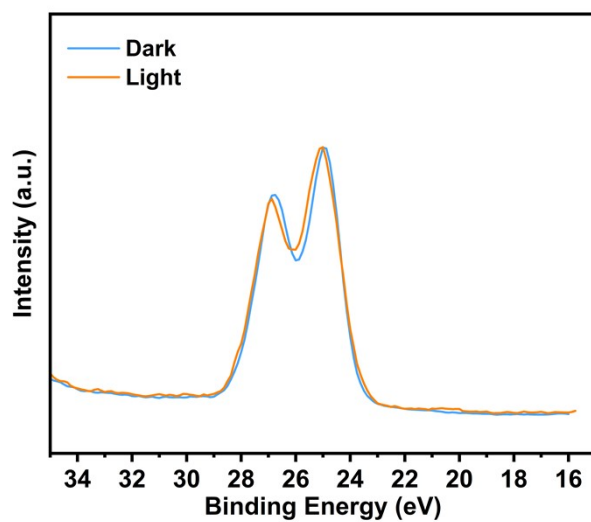

**Fig. S13.** Quasi in situ XPS spectra of Ta 4f for the  $\text{Ta}_2\text{O}_{5-x}$ .

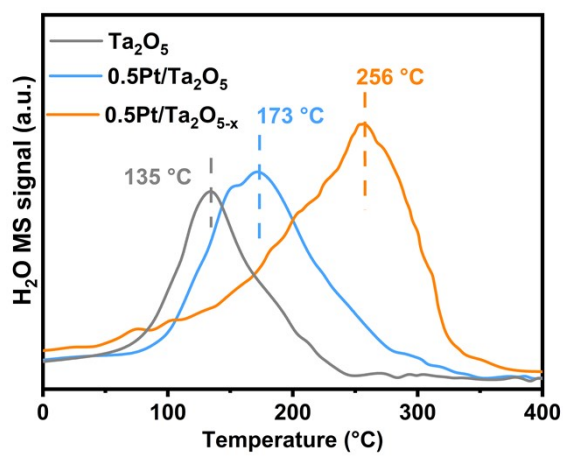

**Fig. S14.** The H<sub>2</sub>O temperature-programmed desorption mass spectra of  $\text{Ta}_2\text{O}_5$ ,  $\text{Pt}/\text{Ta}_2\text{O}_5$ , and  $\text{Pt}/\text{Ta}_2\text{O}_{5-x}$ , respectively.

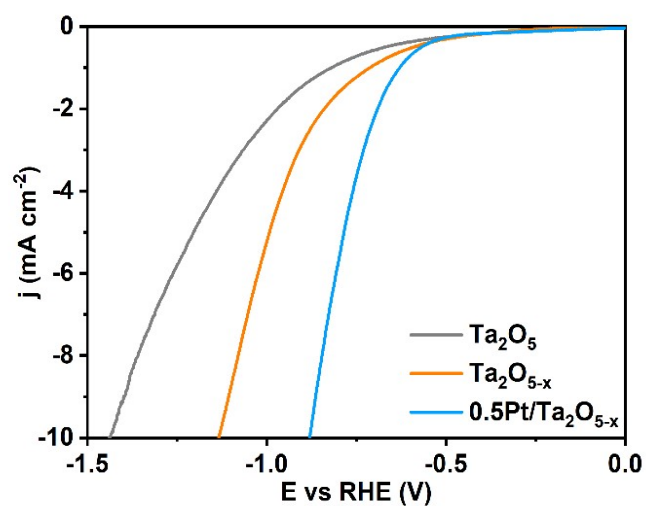

**Fig. S15.** Electrochemical linear sweep voltammetry curves with a scan rate of  $5 \text{ mV s}^{-1}$  in a  $\text{CO}_2$ -saturated  $1.0 \text{ M NaOH}$  solution.

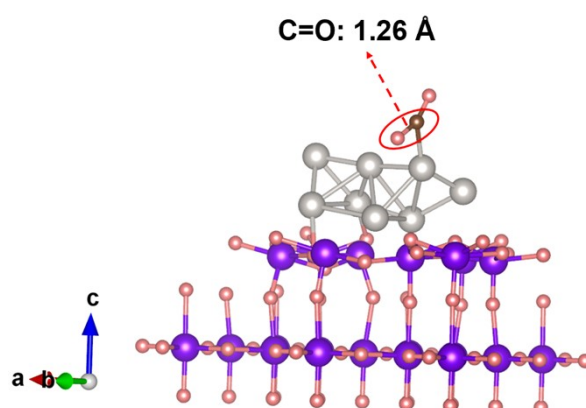

**Fig. S16.** The C=O bond length of  $\text{CO}_2$  after adsorption on  $\text{Pt}/\text{Ta}_2\text{O}_{5-x}$ .

**Table S1.** Pt content in various Pt/Ta<sub>2</sub>O<sub>5-x</sub> catalysts measured by ICP.

| Samples                                 | Measured Pt/Ta (Mole ratio) |
|-----------------------------------------|-----------------------------|
| 0.25Pt/Ta <sub>2</sub> O <sub>5-x</sub> | 0.10%                       |
| 0.5Pt/Ta <sub>2</sub> O <sub>5-x</sub>  | 0.19%                       |
| 0.75Pt/Ta <sub>2</sub> O <sub>5-x</sub> | 0.25%                       |
| 1Pt/Ta <sub>2</sub> O <sub>5-x</sub>    | 0.38%                       |

**Table S2.** Summary of the catalytic performance of the catalysts listed in Fig. 3e.

| Catalyst                                 | Light source                                           | Reaction conditions                                                                             | Metal loading | Major products                                                                                                                                                           | Product selectivity      | AQY           | Ref.      |
|------------------------------------------|--------------------------------------------------------|-------------------------------------------------------------------------------------------------|---------------|--------------------------------------------------------------------------------------------------------------------------------------------------------------------------|--------------------------|---------------|-----------|
| Pt/Ta <sub>2</sub> O <sub>5-x</sub>      | 300 W Xe lamp                                          | Gas-solid, H <sub>2</sub> O                                                                     | 0.5wt%        | CO:516.4μmol g <sup>-1</sup> h <sup>-1</sup><br>H <sub>2</sub> :1456.5μmol g <sup>-1</sup> h <sup>-1</sup><br>CH <sub>4</sub> :432.6μmol g <sup>-1</sup> h <sup>-1</sup> | 82% for syngas           | 3.5% (365nm)  | This Work |
| Cds/Pt/In <sub>2</sub> O <sub>3</sub>    | 300 W Xe lamp<br>with a 420 nm cut-off filter          | H <sub>2</sub> O, TEOA                                                                          | 1.97wt%       | H <sub>2</sub> :691μmol g <sup>-1</sup> h <sup>-1</sup><br>CH <sub>4</sub> :383μmol g <sup>-1</sup> h <sup>-1</sup>                                                      | 100% for CH <sub>4</sub> | 3.9% (420nm)  | 5         |
| Au-Pt/Cu <sub>2</sub> O/ReS <sub>2</sub> | 300 W Xe lamp                                          | Gas-solid, H <sub>2</sub> O                                                                     | 6.0wt%        | CO:60.76μmol g <sup>-1</sup> h <sup>-1</sup><br>CH <sub>4</sub> :39.45μmol g <sup>-1</sup> h <sup>-1</sup>                                                               | 60% for CH <sub>4</sub>  | 0.5% (420nm)  | 6         |
| Co/C <sub>3</sub> N <sub>4</sub>         | 200mW Halogen lamps                                    | MeCN, H <sub>2</sub> O, TEOA                                                                    | 0.1wt%        | CO:503μmol g <sup>-1</sup> h <sup>-1</sup>                                                                                                                               | 71% for CO               | 0.4% (420nm)  | 7         |
| Co/C <sub>3</sub> N <sub>4</sub>         | 300 W Xe lamp<br>with a 420 nm cut-off filter          | H <sub>2</sub> O , TEOA ,<br>C <sub>10</sub> H <sub>8</sub> N <sub>2</sub> , CoCl <sub>2</sub>  | 0.12wt%       | CO:37μmol g <sup>-1</sup> h <sup>-1</sup><br>H <sub>2</sub> :6μmol g <sup>-1</sup> h <sup>-1</sup>                                                                       | 86% for CO               | 0.25% (420nm) | 8         |
| Co/Bi <sub>5</sub> O <sub>4</sub> Br     | 300 W Xe lamp                                          | H <sub>2</sub> O                                                                                | 0.8wt%        | CO:107.1μmol g <sup>-1</sup> h <sup>-1</sup>                                                                                                                             | 100% for CO              | 0.91% (380nm) | 9         |
| Co/C <sub>3</sub> N <sub>4</sub>         | 300 W Xe lamp<br>with a 400 nm cut-off filter<br>150 W | MeCN, H <sub>2</sub> O, TEOA                                                                    | 4.4wt%        | CO:17μmol g <sup>-1</sup> h <sup>-1</sup><br>CH <sub>4</sub> :0.7μmol g <sup>-1</sup> h <sup>-1</sup>                                                                    | 80% for CO               | 0.8% (420nm)  | 10        |
| Ru/ZnS                                   | XBO arc lamp<br>with a 320 nm cut-off filter           | H <sub>2</sub> O , C <sub>3</sub> H <sub>8</sub> O                                              | 0.1wt%        | CO:84μmol g <sup>-1</sup> h <sup>-1</sup><br>HCOOH:240μmol g <sup>-1</sup> h <sup>-1</sup>                                                                               | 74% for HCOOH            | 0.5% (375nm)  | 11        |
| Ru/Ta <sub>2</sub> O <sub>5</sub>        | 300 W Xe lamp                                          | MeCN, H <sub>2</sub> O, TEOA                                                                    | 1.0wt%        | HCOOH :7μmol g <sup>-1</sup> h <sup>-1</sup>                                                                                                                             | 75% for HCOOH            | 1.9% (405nm)  | 12        |
| Ru/C <sub>3</sub> N <sub>4</sub>         | 400 W High-pressure mercury lamps                      | K <sub>2</sub> C <sub>2</sub> O <sub>4</sub> ·H <sub>2</sub> O ,<br>EDTA·2Na , H <sub>2</sub> O | 5.0wt%        | HCOOH:42.3μmol g <sup>-1</sup> h <sup>-1</sup>                                                                                                                           | 98% for HCOOH            | 5.2% (400nm)  | 13        |
| Ru/GaN:ZnO                               | 300 W Xe lamp<br>with a 400 nm cut-off filter          | Na <sub>2</sub> CO <sub>3</sub> , H <sub>2</sub> O ,<br>Na <sub>4</sub> EDTA                    | 1.5wt%        | H <sub>2</sub> :30μmol g <sup>-1</sup> h <sup>-1</sup><br>HCOOH:65μmol g <sup>-1</sup> h <sup>-1</sup>                                                                   | 68% for HCOOH            | 1% (400nm)    | 14        |
| Ag/CN                                    | 300 W Xe lamp<br>with a 400 nm cut-off filter          | Gas-solid, H <sub>2</sub> O                                                                     | 0.73wt%       | CO:160μmol g <sup>-1</sup> h <sup>-1</sup>                                                                                                                               | 94% for CO               | 4.8% (365nm)  | 15        |
| Al@Cu <sub>2</sub> O                     | 300 W Xe lamp<br>with a 400 nm cut-off filter          | CO <sub>2</sub> , H <sub>2</sub>                                                                | 5.0wt%        | CO:360 μmolcm <sup>-2</sup> h <sup>-1</sup>                                                                                                                              | 97% for CO               | 0.35% (420nm) | 16        |
| Au/TZO                                   | 300 W Xe lamp<br>with a 400 nm cut-off filter          | MeCN, H <sub>2</sub> O, TEOA                                                                    | 1.2wt%        | H <sub>2</sub> :271.6μmol g <sup>-1</sup> h <sup>-1</sup><br>CO:260.6μmol g <sup>-1</sup> h <sup>-1</sup>                                                                | 98% for syngas           | 2.4% (400nm)  | 17        |
| CuO/TiO <sub>2</sub>                     | 40 W Hg UV lamp                                        | Gas-solid, H <sub>2</sub> O                                                                     | 3.0wt%        | CO:14.5μmol g <sup>-1</sup> h <sup>-1</sup><br>H <sub>2</sub> :2.8μmol g <sup>-1</sup> h <sup>-1</sup><br>CH <sub>4</sub> :2.1μmol g <sup>-1</sup> h <sup>-1</sup>       | 75% for CO               | 2% (254nm)    | 18        |

**REFERENCES**

1. Delley, B. An all-electron numerical method for solving the local density functional for polyatomic molecules. *J. Chem. Phys.* **1990**, 92, 508–517.
2. Delley, B. From molecules to solids with the DMol3 approach. *J. Chem. Phys.* **2000**, 113, 7756–7764.
3. Kresse, G., Furthmüller, J. Efficient iterative schemes for ab initio total-energy calculations using a plane-wave basis set. *Phys. Rev. B Condens. Matter.* **1996**, 54, 11169–11186.
4. Perdew, J. P.; Burke, K.; Ernzerhof, M. Generalized gradient approximation made simple. *Phys. Rev. Lett.* **1996**, 77, 3865.
5. Liu, P.; Men, Y. L.; Meng, X. Y.; Peng, C.; Zhao, Y.; Pan, Y. X., Electronic Interactions on Platinum/(Metal-Oxide)-Based Photocatalysts Boost Selective Photoreduction of CO<sub>2</sub> to CH<sub>4</sub>. *Angew. Chem. Int. Ed.* **2023**, 62, e202309443.
6. Zeng, J.; Jiang, Z.; Lv, K.; Ahmad, S.A.; Chen, X.; Zhang, W.; J.; Zhu, T., Experimental and calculation investigations of the photocatalytic selective and performance for CO<sub>2</sub> reduction by cobalt-doped Bi<sub>4</sub>O<sub>5</sub>Br<sub>2</sub> nanosheets. *Ceram. Int.* **2024**, 12.
7. Huang, P.; Huang, J.; Pantovich, S. A.; Carl, A. D.; Fenton, T. G.; Caputo, C. A.; Grimm, R. L.; Frenkel, A. I.; Li, G., Selective CO<sub>2</sub> reduction catalyzed by single cobalt sites on carbon nitride under visible-light irradiation. *J. Am. Chem. Soc.* **2018**, 140, 16042-16047.
8. Lin, J.; Pan, Z.; Wang, X., Photochemical reduction of CO<sub>2</sub> by graphitic carbon nitride polymers. *ACS Sustain. Chem. Eng.* **2014**, 2, 353-358.
9. Di, J.; Chen, C.; Yang, S. Z.; Chen, S.; Duan, M.; Xiong, J.; Zhu, C.; Long, R.; Hao, W.; Chi, Z.; Chen, H., Isolated single atom cobalt in Bi<sub>3</sub>O<sub>4</sub>Br atomic layers to trigger efficient CO<sub>2</sub> photoreduction. *Nat. Commun.* **2019**, 10, 2840.
10. Zhao, G.; Pang, H.; Liu, G.; Li, P.; Liu, H.; Zhang, H.; Shi, L.; Ye, J., Co-porphyrin/carbon nitride hybrids for improved photocatalytic CO<sub>2</sub> reduction under visible light. *Appl. Catal. B: Environ.* **2017**, 200, 141-149.
11. Baran, T.; Wojtyła, S.; Dibenedetto, A.; Aresta, M.; Macyk, W., Zinc sulfide functionalized with ruthenium nanoparticles for photocatalytic reduction of CO<sub>2</sub>. *Appl. Catal. B: Environ.* **2015**, 178, 170-176.
12. Sato, S.; Morikawa, T.; Saeki, S.; Kajino, T.; Motohiro, T., Visible-Light-Induced Selective CO<sub>2</sub> Reduction Utilizing a Ruthenium Complex Electrocatalyst Linked to a p-Type Nitrogen-Doped Ta<sub>2</sub>O<sub>5</sub> Semiconductor. *Angew. Chem. Int. Ed.* **2010**, 4, 5101.
13. Kuriki, R.; Matsunaga, H.; Nakashima, T.; Wada, K.; Yamakata, A.; Ishitani, O.; Maeda, K., Nature-inspired, highly durable CO<sub>2</sub> reduction system consisting of a binuclear ruthenium (II) complex and an organic semiconductor using visible light. *J. Am. Chem. Soc.* **2016**, 138, 5159-5170.
14. Nakada, A.; Kuriki, R.; Sekizawa, K.; Nishioka, S.; Vequizo, J. J. M.; Uchiyama, T.; Kawakami, N.; Lu, D.; Yamakata, A.; Uchimoto, Y.; Ishitani, O., Effects of interfacial electron transfer in metal complex–semiconductor hybrid photocatalysts on Z-scheme CO<sub>2</sub> reduction under visible light. *ACS Catal.* **2018**, 8, 9744-9754.
15. Hu, S.; Qiao, P.; Yi, X.; Lei, Y.; Hu, H.; Ye, J.; Wang, D., Selective photocatalytic reduction of CO<sub>2</sub> to CO mediated by silver single atoms anchored on tubular carbon nitride. *Angew. Chem. Int. Ed.* **2023**, 62, e202304585.



16. Robatjazi, H.; Zhao, H.; Swearer, D. F.; Hogan, N. J.; Zhou, L.; Alabastri, A.; McClain, M. J.; Nordlander, P.; Halas, N. J., Plasmon-induced selective carbon dioxide conversion on earth-abundant aluminum-cuprous oxide antenna-reactor nanoparticles. *Nat. Commun.* **2017**, 8, 27.
17. Huang, N. Y.; Li, B.; Wu, D.; Chen, Z. Y.; Shao, B.; Chen, D.; Zheng, Y. T.; Wang, W.; Yang, C.; Gu, M.; Li, L., Crystal Engineering of MOF-Derived Bimetallic Oxide Solid Solution Anchored with Au Nanoparticles for Photocatalytic CO<sub>2</sub> Reduction to Syngas and C<sub>2</sub> Hydrocarbons. *Angew. Chem. Int. Ed.* **2024**, e202319177.
18. Fang, B.; Xing, Y.; Bonakdarpour, A.; Zhang, S.; Wilkinson, D. P., Hierarchical CuO–TiO<sub>2</sub> hollow microspheres for highly efficient photodriven reduction of CO<sub>2</sub> to CH<sub>4</sub>. *ACS Sustain. Chem. Eng.* **2015**, 3, 2381-2388.
